# Supplementary material for: Motor engagement enhances incidental memory for task-irrelevant items
Source: Front Psychol. 2022 Aug 16;13:914877. doi: 10.3389/fpsyg.2022.914877 (PMC9453871; doi:10.3389/fpsyg.2022.914877)
Supplement: Supplementary file 1 [file Table_1.XLSX]

## Sheet: Sheet1
		Go			No-Go
		Pre	Post		Pre	Post
	Hit rate
	Motor task
	Mean	0.33543	0.383824		0.323685	0.397901
	SD	0.210503	0.223923		0.218347	0.215291
	Cognitive task
	Mean	0.324636	0.390308		0.319906	0.356885
	SD	0.227898	0.23421		0.222474	0.243792
	FA rate
	Motor task & Cognitive task
	Mean	0.21861	0.21861		0.21861	0.21861
	SD	0.174256	0.174256		0.174256	0.174256
	d priem
	Motor task
	Mean	0.403325	0.565075		0.369067	0.633352
	SD	0.467036	0.539824		0.464056	0.529419
	Cognitive task
	Mean	0.271473	0.552648		0.312817	0.409555
	SD	0.716846	0.632862		0.649878	0.745168
	Criterion
	Motor task
	Mean	-0.201662	-0.282537		-0.184533	-0.316676
	SD	0.233518	0.269912		0.232028	0.264709
	Cognitive task
	Mean	-0.135737	-0.276324		-0.156409	-0.204778
	SD	0.358423	0.316431		0.324939	0.372584
